# Supplementary material
Source: publisher site journal article supplement (https://www.dovepress.com/article/398601)
Supplement: Supplementary file 1 [file get_supplementary_file.php]

Table S1. Ultrasound features of the nodules according to final diagnosis.

|  | HT | | *P* value | Non-HT | | *P* value |
| --- | --- | --- | --- | --- | --- | --- |
| Malignant | Benign | Malignant | Benign |
| Size(cm) | 0.8±0.4 | 1.4±1.0 | <0.001 | 0.8±0.5 | 1.5±1.0 | <0.001 |
| <1cm | 120(74.5%) | 31(50.0%) | <0.001 | 203(76.6%) | 90(39.5%) | <0.001 |
| ≥1 and <2cm | 39(24.2%) | 15(24.2%) |  | 54(20.4%) | 84(36.8%) |  |
| ≥2cm | 2(1.3%) | 16(25.8%) |  | 8(3.0%) | 54(23.7%) |  |
| Site |  |  | 0.11 |  |  | 0.203 |
| Left | 81(50.3%) | 22(35.5%) |  | 133(50.2%) | 99(43.4%) |  |
| Isthmus | 4(2.5%) | 1(1.6%) |  | 4(1.5%) | 7(3.1%) |  |
| Right | 76(47.2%) | 39(62.9%) |  | 128(48.3%) | 122(53.5%) |  |
| Composition |  |  | 0.002 |  |  | <0.001 |
| Cyst or almost completely cystic | 0 | 0 |  | 0 | 0 |  |
| Spongiform | 5(3.1%) | 9(14.5%) |  | 10(3.8%) | 39(17.2%) |  |
| Mixed cystic and solid | 0(0%) | 1(1.6%) |  | 0(0%) | 3(1.3%) |  |
| Solid or almost completely solid | 156(96.9%) | 52(83.9%) |  | 255(96.2%) | 185(81.5%) |  |
| Echogenicity |  |  | <0.001 |  |  | <0.001 |
| Anechoic | 0 | 0 |  | 0(0%) | 1(0.5%) |  |
| Hyper- to isoechoic | 2(1.2%) | 14(22.6%) |  | 4(1.5%) | 50(21.9%) |  |
| Hypoechoic | 156(96.9%) | 48(77.4%) |  | 257(97.0%) | 174(76.3%) |  |
| Markedly hypoechoic | 3(1.9%) | 0(0.0%) |  | 4(1.5%) | 3(1.3%) |  |
| Shape |  |  | <0.001 |  |  | <0.001 |
| Wider than tall | 94(58.4%) | 53(85.5%) |  | 128(48.3%) | 203(89.0%) |  |
| Taller than wide | 67(41.6%) | 9(14.5%) |  | 137(51.7%) | 25(11.0%) |  |
| Margin |  |  | 0.55 |  |  | <0.001 |
| Smooth or ill-defined | 115(71.4%) | 52(83.9%) |  | 189(71.3%) | 201(88.2%) |  |
| Lobulated or irregular | 46(28.6%) | 10(16.1%) |  | 76(28.7%) | 27(11.8%) |  |
| Echogenic foci |  |  | <0.001 |  |  | <0.001 |
| None or large comet-tail artifact | 82(50.9%) | 49(79.0%) |  | 147(55.5%) | 148(64.9%) |  |
| Macro-calcifications | 21(13.0%) | 7(11.3%) |  | 31(11.7%) | 48(21.0%) |  |
| Peripheral calcifications | 4(2.5%) | 3(4.8%) |  | 3(1.1%) | 7(3.1%) |  |
| Punctate echogenic foci | 54(33.5%) | 3(4.8%) |  | 84(31.7%) | 25(11.0%) |  |

Data were expressed as mean ± standard deviation for normal distribution. HT: Hashimoto’s thyroiditis.
